# Supplementary material
Source: publisher figshare collection journal article supplement (https://diabetesjournals.figshare.com/articles/dataset/_/22120454)
Supplement: Supplementary file 2 [file 1]

# Supplementary Tables

**Table 1. Clinical characteristics of DKD. Related to Figure 1-2 and 5.**

| Control group (n = 15) for serum samples analysis                                                          |              |        |               |              |               |               |               |               |                |                 |                |
|------------------------------------------------------------------------------------------------------------|--------------|--------|---------------|--------------|---------------|---------------|---------------|---------------|----------------|-----------------|----------------|
| Number                                                                                                     | Age (year)   | Sex    | SCr(μmo l/L)  | BUN (mmol/   | FBG (mmol/ L) | HbA1c (%)     | CHO (mmol/ L) | TG (mmol/L)   | HDL-C(mm ol/L) | LDL-C(mmол/L)   |                |
| 1                                                                                                          | 61           | M      | 106           | 8.1          | 5.01          | NA            | 4.1           | 0.74          | 1.44           | 2.63            |                |
| 2                                                                                                          | 83           | M      | 76            | 8.05         | 4.77          | NA            | 5             | 1.57          | 1.29           | 3.38            |                |
| 3                                                                                                          | 50           | F      | 63            | 4.01         | 5.29          | NA            | 4.92          | 0.89          | 1.45           | 3.45            |                |
| 4                                                                                                          | 51           | M      | 93            | 5.22         | 5.39          | NA            | 4.39          | 1.01          | 1.18           | 2.98            |                |
| 5                                                                                                          | 44           | F      | 45            | 3.15         | 5.86          | NA            | 3.72          | 1.25          | 1.49           | 1.73            |                |
| 6                                                                                                          | 45           | F      | 45            | 4.34         | 4.88          | NA            | 3.68          | 0.46          | 1.42           | 1.85            |                |
| 7                                                                                                          | 27           | M      | 81            | 3.30         | 4.67          | NA            | 3.70          | 0.68          | 1.39           | 2.28            |                |
| 9                                                                                                          | 59           | M      | 84            | 4.9          | 4.76          | NA            | 4.52          | 1.31          | 1.24           | 2.86            |                |
| 10                                                                                                         | 45           | F      | 73            | 6.1          | 5.07          | NA            | 3.3           | 0.52          | 1.32           | 1.65            |                |
| 12                                                                                                         | 23           | F      | 52            | 3.04         | 5.22          | NA            | NA            | NA            | NA             | NA              |                |
| 14                                                                                                         | 36           | M      | 96            | 5.01         | 4.30          | NA            | 4.37          | 0.97          | 1.34           | 2.46            |                |
| 15                                                                                                         | 42           | F      | 57            | 4.43         | 4.35          | NA            | 4.8           | 1.1           | 1.41           | 2.85            |                |
| mean ± SD                                                                                                  | 47.17 ±15.93 |        | 72.58 ± 20.39 | 4.97 ± 1.71  | 4.96 ± 0.44   |               | 4.23 ± 0.57   | 0.95 ± 0.34   | 1.36 ± 0.10    | 2.56 ± 0.63     |                |
| DKD group (n = 18) for serum samples analysis and immunohistochemical staining of renal biopsies specimens |              |        |               |              |               |               |               |               |                |                 |                |
| Number                                                                                                     | DRG          | (year) | Sex           | SCr (μmol/L) | BUN (mmol/ L) | FBG (mmol/ L) | HbA1c (%)     | CHO (mmol/ L) | TG (mmol /L)   | HDL-C (mmol/ L) | LDL-C (mmol/L) |
| 1                                                                                                          | II           | 66     | M             | 94           | 8.44          | 4.24          | 7.58          | 4.53          | 2.36           | 1.12            | 2.95           |
| 2                                                                                                          | II           | 63     | F             | 36.21        | 5.03          | 17.47         | 9.26          | 6.05          | 3.02           | 2.01            | 3.29           |
| 3                                                                                                          | II           | 61     | M             | 105.57       | 8.1           | 4.79          | 6.5           | 4.34          | 2.37           | 1.37            | 2.69           |
| 4                                                                                                          | II           | 52     | F             | 44.47        | 3.01          | 4.03          | 5.8           | 6.21          | 1.85           | 1.68            | 3.95           |
| 5                                                                                                          | II           | 67     | M             | 81           | 3.8           | 5.01          | 5.91          | 3.35          | 1.59           | 1.16            | 1.66           |
| 6                                                                                                          | III          | 62     | M             | 292.61       | 20.01         | 3.46          | 5.6           | 3.9           | 1.1            | 1.19            | 2.58           |
| 7                                                                                                          | III          | 72     | M             | 130          | 8.02          | 4.19          | NA            | 3.64          | 1.03           | 1.05            | 2.14           |
| 8                                                                                                          | III          | 51     | M             | 77           | 5.0           | 9.57          | NA            | 3.72          | 1.89           | 0.9             | 2.21           |
| 9                                                                                                          | III          | 46     | M             | 281.56       | 13.44         | 13.98         | NA            | 2.91          | 1.42           | 0.95            | 1.59           |
| 10                                                                                                         | III          | 61     | M             | 189.24       | 8.54          | 5.18          | 5.2           | 5.1           | 3.38           | 1.01            | 3.4            |
| 11                                                                                                         | III          | 53     | M             | 74.18        | 12.28         | NA            | 8.1           | 6.27          | 0.68           | 1.34            | 4.03           |
| 12                                                                                                         | IV           | 46     | M             | 361.41       | 8.23          | 5.79          | 6.7           | 6.01          | 4.96           | 0.66            | 3.77           |
| 13                                                                                                         | IV           | 66     | M             | 240          | 25.5          | 11.58         | 7.2           | 3.94          | 1.14           | 1.46            | 2.21           |

|               |    |                     |   |                        |                     |                 |                    |                    |                    |                    |                    |
|---------------|----|---------------------|---|------------------------|---------------------|-----------------|--------------------|--------------------|--------------------|--------------------|--------------------|
| 14            | IV | 42                  | F | 525.6                  | 16.47               | 6.57            | NA                 | 10.32              | 14                 | 1.12               | 3.97               |
| 15            | IV | 52                  | F | 894.5                  | 40.97               | 10.76           | 5.4                | 4.46               | 1.6                | 0.99               | 3.02               |
| 16            | IV | 53                  | M | 826.87                 | 26.51               | NA              | NA                 | 5.09               | 1.41               | 1.83               | 2.93               |
| 17            | IV | 51                  | F | 334.32                 | 13.72               | 6.18            | 6.1                | 3.93               | 1.8                | 0.98               | 2.65               |
| 18            | IV | 38                  | F | 268.36                 | 11.74               | NA              | 7                  | 4.42               | 1.28               | 0.96               | 2.55               |
| mean $\pm$ SD |    | 55.67 $\pm$<br>9.49 |   | 269.83 $\pm$<br>252.10 | 13.27 $\pm$<br>9.73 | 7.52 $\pm$ 4.20 | 6.64 $\pm$<br>1.18 | 4.90 $\pm$<br>1.69 | 2.60 $\pm$<br>3.02 | 1.21 $\pm$<br>0.35 | 2.87 $\pm$<br>0.76 |

DRG, Diagnosis Related Grading; FBG, fasting blood glucose; SCr, serum creatinine; BUN, Blood urea nitrogen; CHO, total cholesterol; TG, triglyceride; LDL-C, low density lipoprotein cholesterol; HDL-C, high density, lipoprotein cholesterol; HbA1c, hemoglobin A1c; NA, not applicable/not available; F, female; M, male; DKD, diabetic kidney disease. Data are expressed as mean  $\pm$  SD.

**Table 2. Physical and biochemical parameters of *db/db* and STZ/HFD-induced diabetic mice. Related to Figure 1.**

| Variables       | 40 weeks     |                | HFD/STZ      |                           |
|-----------------|--------------|----------------|--------------|---------------------------|
|                 | WT           | <i>db/db</i>   | NCD          | HFD/STZ                   |
| BW (g)          | 24.45 ± 2.58 | 43.09 ± 13.91* | 27.97 ± 1.30 | 28.63 ± 3.68 <sup>#</sup> |
| FBG<br>(mmol/L) | 5.27 ± 1.23  | 19.15 ± 7.54*  | 5.77 ± 1.07  | 23.43 ± 7.48 <sup>#</sup> |
| Scr (μmol/L)    | 22.11 ± 5.39 | 31.27 ± 4.80*  | 21.53 ± 1.82 | 33.82 ± 3.48 <sup>#</sup> |
| TG (mmol/L)     | 0.98 ± 0.19  | 1.22 ± 0.47*   | 0.88 ± 0.12  | 1.35 ± 0.15 <sup>#</sup>  |

BW, body weight; FBG, fasting blood glucose; Scr, serum creatinine; TG, triglyceride. Data are expressed as means ± SD. \*P < 0.05 vs. wild type (WT) mice (n = 14) or <sup>#</sup>P < 0.05 vs. NCD mice (n = 20).

**Table 3. Primers for real-time RT-PCR and shRNA.**

| Gene                       | Forward (5' to 3')        | Reverse (5' to 3')       |
|----------------------------|---------------------------|--------------------------|
| <i>Mus Metrn1</i>          | GGAATTCCTCTTCACTGGACAT    | CTTCTGCTTTCCTGTACATCCT   |
| <i>Mus Gapdh</i>           | AGGTCGGTGTGAACGGATTG      | TGTAGACCATGTAGTTGAGGTCA  |
| <i>Mus Scd1</i>            | TGTCTCGGTGTGTGTCGGAGT     | TGTACCACTACCTGCCTGCATG   |
| <i>Mus CPT-1a</i>          | TCAAGCCAGACGAAGAACATC     | TGGTAGGAGAGCAGCACCTT     |
| <i>Mus PGC-1a</i>          | GACACGAGGAAAGGAAGACTAAA   | GTCTTGAGAGTCCTGTGATATG   |
| <i>Mus ATP5b</i>           | CCAAGGTAGCGTTGGTATATGG    | CCCTCCTGGTCTCTGAAGTAT    |
| <i>Mus Ndufa10</i>         | GAGTACAGCCGAGTGATAACAG    | GCTTCTGGGTAGTGCTTCAT     |
| <i>Mus Rab7</i>            | CTTCTGACCAAGGAGGTGATG     | TAGAAGGCCACACCAAGAGA     |
| <i>Mus Pink1</i>           | GGCTTCCGTCTGGAGGATTAT     | AACCTGCCGAGATATTCCACA    |
| <i>Mus Atg7</i>            | GTTGCCCCCTTTAATAGTGC      | TGAACTCCAACGTCAAGCGG     |
| <i>Mus Ppara</i>           | AGAGCCCCATCTGTCCTCTC      | ACTGGTAGTCTGCAAAACCAAA   |
| <i>Mus Acadl</i>           | CTCAGGACACAGCAGAACTATT    | GCTCTTGCATGAGGTAGTAGAA   |
| <i>Mus Sirt3</i>           | CTGCTTCTGCGGCTCTATAC      | GACCGTGCATGTAGCTGTTA     |
| <i>Rat Gapdh</i>           | GGAGAAACCTGCCAAGTATGA     | TTGAAGTCACAGGAGACAACC    |
| <i>Rat PGC-1a</i>          | GAGCTCTCGGGAACCTAAAGAAG   | CCGAACACCGGAAGGTAATAA    |
| <i>Rat TFAM</i>            | CTGATGGGCTTAGAGAAGGAAG    | TGTTATATGCTGATCGAGGTCTTT |
| <i>Rat COX2</i>            | TGAGCCATCCCTTCACTAGG      | TGAGCCGCAAATTTCAAG       |
| <i>Rat β-actin</i>         | CTGCTCTTTCCAGATGAGG       | CCACAGCACTGTAGGGGTTT     |
| <i>Rat PGC-1a</i><br>(PP1) | CAACCAACCAACCAAGCAAAA     | CTGGTGTAGGTACGAGGAACC    |
| <i>Rat PGC-1a</i><br>(PP2) | CAGATGCCTTCAGCCTTGAT      | TAGCTGGCACTTGCTTTAACT    |
| <i>Rat PGC-1a</i>          | CACAGAATGTTGTACCATATATAAG | GGTTCCAGCAGTTAAAGCTTATT  |

|                       |                       |                       |
|-----------------------|-----------------------|-----------------------|
| <i>(PP3)</i>          | CAG                   |                       |
| <i>Rat PGC-1α</i>     | CTCGGGCCTCCTTTAGTTAAT | GAATCTAGACTCCCTGCGTTC |
| <i>(PP4)</i>          |                       |                       |
| <i>Rat PGC-1α</i>     | GTTGCGGTCGTCAAGGTAA   | TGTACCCAGGCACCTCTATAA |
| <i>(PP5)</i>          |                       |                       |
| shRNA-Metr<br>nl(rat) | GGGCATAAACCCTTGTGAAAT |                       |
| shRNA-UCP<br>l(rat)   | GGTCAGAATGCAAGCACAAAG |                       |

## Supplementary Tables

**Table 4. Key resources table**

| Reagent or resource                                          | Source                    | Identifier      |
|--------------------------------------------------------------|---------------------------|-----------------|
| <b>Antibodies</b>                                            |                           |                 |
| Collagen Type III Rabbit Polyclonal antibody (1:1000)        | Proteintech               | Cat# 22734-1-AP |
| Rb pAb to Fibronectin (1:1000)                               | Abcam                     | Cat# ab2413     |
| E-cadherin Rabbit Polyclonal antibody (1:5000)               | Proteintech               | Cat# 20874-1-AP |
| Alpha Tubulin Rabbit PolyAb(1:5000)                          | Proteintech               | Cat# 11224-1-AP |
| Actin mAb-HRP (1:5000)                                       | Biopm                     | Cat# PMK058S    |
| GAPDH Mouse Monoclonal Antibody(2B8)-HRP conjugated (1:5000) | Biopm                     | Cat# PMK053S    |
| Pink1 Rabbit Polyclonal antibody (1:1000)                    | Proteintech               | Cat# 23274-1-AP |
| Park2 Rabbit Polyclonal antibody (1:1000)                    | Proteintech               | Cat# 14060-1-AP |
| AMPK Alpha 1 Rabbit Polyclonal antibody (1:1000)             | Proteintech               | Cat# 10929-2-AP |
| Phospho-AMPKa (Thr172) (D4D6D) Rabbit mAb (1:1000)           | Cell Signaling technology | Cat# 50081      |
| LC3A/B(D3U4C) XP Rabbit mAb (1:1000)                         | Cell Signaling technology | Cat# 12741S     |
| Drp1(C-terminal) Rabbit PolyAb (1:1000)                      | Proteintech               | Cat# 12957-1-AP |
| ADRP/Perilipin 2 Rabbit PolyAb (1:1500)                      | Proteintech               | Cat# 15294-1-AP |

|                                                   |                          |                   |
|---------------------------------------------------|--------------------------|-------------------|
| Rb pAb to METRNL(1:1000)                          | Abcam                    | Cat# ab235775     |
| Human Meteorin-like/METRNL antibody (1:1000)      | R&D                      | Cat# MAB78672-100 |
| UCP1 Rabbit PolyAb (1:1000)                       | Proteintech              | Cat# 23673-1-AP   |
| CPT1A Rabbit PolyAb (1:1000)                      | Proteintech              | Cat# 15184-1-AP   |
| ACOX1 Polyclonal antibody (1:1000)                | Proteintech              | Cat# 10957-1-AP   |
| Mfn1 Rabbit PolyAb (1:1000)                       | Proteintech              | Cat# 13798-1-AP   |
| PGC-1a Mouse McAb (1:3000)                        | Proteintech              | Cat# 66369-1-Ig   |
| Anti-SIRT1 antibody (1:1000)                      | Abcam                    | Cat# Ab110304     |
| Sirt2(A-5) mouse monoclonal IgG (1:300)           | Santa Cruz Biotechnology | Cat# sc-28298     |
| Sirt3 Rabbit PolyAb (1:1000)                      | Proteintech              | Cat# 10099-1-AP   |
| Sirt4 Mouse McAb (1:10000)                        | Proteintech              | Cat# 66543-1-Ig   |
| Sirt5(G-2) mouse monoclonal IgG (1:300)           | Santa Cruz Biotechnology | Cat# sc-271635    |
| Sirt6 Rabbit PolyAb (1:1000)                      | Proteintech              | Cat# 13572-1-AP   |
| Sirt7(C-3) mouse monoclonal IgG (1:300)           | Santa Cruz Biotechnology | Cat# sc-365344    |
| Goat anti-Rabbit IgG(H+L) HRP Conjugated (1:8000) | Biopm                    | Cat# PMK-014-090M |
| Goat anti-Mouse IgG(H+L) HRP Conjugated (1:8000)  | Biopm                    | Cat# PMK-014-091M |
| GFP tag Rabbit Polyclonal antibody (1:1000)       | Proteintech              | Cat# 50430-2-AP   |

|                                                      |            |             |
|------------------------------------------------------|------------|-------------|
| Alexa Fluor™ 488 rabbit anti-mouse IgG (H+L) (1:200) | Invitrogen | Cat# A11059 |
| Alexa Fluor™ 555 goat anti-rabbit IgG (H+L) (1:200)  | Invitrogen | Cat# A21429 |

---

### Chemicals and Recombinant Proteins

---

|                                                                              |            |                        |
|------------------------------------------------------------------------------|------------|------------------------|
| Recombinant Mouse Meteorin-like/METRNL Protein, CF                           | R&D        | Cat# 6679-MN           |
| High Fat (60 FDC) Purified Rodent Diet                                       | Dyets      | Cat# HF60              |
| Mayer' Hematoxylin solution                                                  | Solarbio   | Cat# G1080             |
| Palmitic acid                                                                | SIGMA      | Cat# P0500-10G         |
| Protease Inhibitor Cocktail                                                  | MCE        | Cat# HY-K0010          |
| Phosphatase Inhibitor Cocktail II                                            | MCE        | Cat# HY-K0022          |
| CL 316243                                                                    | MCE        | Cat# HY-116771A        |
| 3-TYP                                                                        | MCE        | Cat# HY-108331         |
| Dorsomorphin                                                                 | MCE        | Cat# HY-13418A/CS-2487 |
| Trizol                                                                       | Invitrogen | Cat# 15596026          |
| Hieff UNICON® Universal Blue qPCR SYBR Green Master Mix                      | YEASEN     | Cat# 11184ES08         |
| Hifair® III 1st Strand cDNA Synthesis SuperMix for qPCR (gDNA digester plus) | YEASEN     | Cat# 11141ES60         |
| Mounting Medium, antifading (with DAPI)                                      | Solarbio   | Cat# S2110             |

|                                                       |                    |                |
|-------------------------------------------------------|--------------------|----------------|
| GTVisionTM III Detection System/Mo&Rb (Including DAB) | Geen Tech          | Cat# GK500705  |
| Oil Red O solution                                    | Sigma-Aldrich      | Cat# O0625     |
| Nile Red                                              | Sigma-Aldrich      | Cat# 19123     |
| RIPA Lysis Buffer                                     | Beyotime           | Cat# P0013B    |
| Smart-ECL Enhanced                                    | Smart-Lifesciences | Cat# H31500    |
| Streptozocin                                          | Yeasen             | Cat# 60256ES76 |
| Bafilomycin A1                                        | MCE                | Cat# HY-100558 |

---

#### **Critical Commercial Assays**

---

|                                                                         |                           |                     |
|-------------------------------------------------------------------------|---------------------------|---------------------|
| Mouse Meteorin-like protein (METRNL) ELISA kit                          | CUSABIO                   | Cat# CSB-ELO13718MO |
| Immuno Diagnostics Wide range mouse insulin immunoassay kit             | IMD                       | Cat# 32100          |
| Glycogen Periodic Acid Schiff (PAS/Hematoxylin) Stain Kit               | Solarbio                  | Cat# G1281          |
| Blood Urea Nitrogen (BUN) Assay (KitSpectrophotometer/icroplate Reader) | Solarbio                  | Cat# BC1535         |
| Creatinine (Cr) Assay kit (sarcosine oxidase)                           | Nanjing Jiancheng         | Cat# C011-2-1       |
| Mouse MAU(Microalbuminuria) ELISA Kit                                   | Elabscience               | Cat# E-EL-M0792c    |
| Tissue Cell Triglyceride (TG) Enzymatic Assay Kit                       | Applygen                  | Cat# E1013          |
| MitoTracker Red CMXRos                                                  | Cell Signaling technology | Cat# 9082           |



|                                   |                               |                                                                               |
|-----------------------------------|-------------------------------|-------------------------------------------------------------------------------|
| JC-1                              | Beyotime                      | Cat# C2005                                                                    |
| XFp Cell Mito Stress Test Kit     | Agilent                       | Cat# 103010-100                                                               |
| TIANamp Genomic DNA kit           | TIANGen                       | Cat#DP304-02                                                                  |
| SimpleChip Kits                   | Cell Signaling technology     | Cat# 45061                                                                    |
| <b>Recombinant DNA</b>            |                               |                                                                               |
| pCDH-CMV-MCS-EF1-Puro-Metrl       | This paper                    | N/A                                                                           |
| pCDH-CMV-MCS-EF1-Puro-Sirt3       | This paper                    | N/A                                                                           |
| pLK0.1-TRC-copGFP-Puro-sh-Metrl   | This paper                    | N/A                                                                           |
| pLK0.1-TRC-copGFP-2A-Puro-sh-UCP1 | This paper                    | N/A                                                                           |
| <b>Software</b>                   |                               |                                                                               |
| ImageJ                            | National Institutes of Health | <a href="https://imagej.nih.gov/ij/">https://imagej.nih.gov/ij/</a>           |
| GraphPad Prism 8.0                | GraphPad                      | <a href="https://www.graphpad.com/">https://www.graphpad.com/</a>             |
| Adobe Illustrator                 | Adobe                         | <a href="http://ai.nbj.cn/">http://ai.nbj.cn/</a>                             |
| OlyVIA                            | Olympus Corporation           | <a href="https://www.olympus-ims.com.cn/">https://www.olympus-ims.com.cn/</a> |
| Image-Pro Plus                    | Media Cybernetics             | <a href="https://www.totalsmart.com.tw/c">https://www.totalsmart.com.tw/c</a> |

n/image-pro-plus

---
